# Supplementary material for: Suppression of oligomer formation in glucose dehydration by CO2 and tetrahydrofuran
Source: Royal Society of Chemistry journal article supplement (doi:10.1039/c7gc01115f), 2017-01-01
Supplement: c7gc01115f1.pdf [file c7gc01115f1.pdf]

## **- Supporting Information-**

# **Suppression of Oligomer formation in Glucose Dehydration by CO<sub>2</sub> and Tetrahydrofuran**

Xing Fu, Jinhang Dai, Xiawei Guo, Jinqiang Tang, Liangfang Zhu\*, and Changwei Hu\*

*Key Laboratory of Green Chemistry and Technology, Ministry of Education, College of Chemistry, Sichuan University,  
Chengdu, Sichuan 610064, P. R. China.*

*\*Corresponding author, E-mail: changwei.hu@scu.edu.cn and zhulf@scu.edu.cn. Tel / Fax: (+86) 028-85411105.*



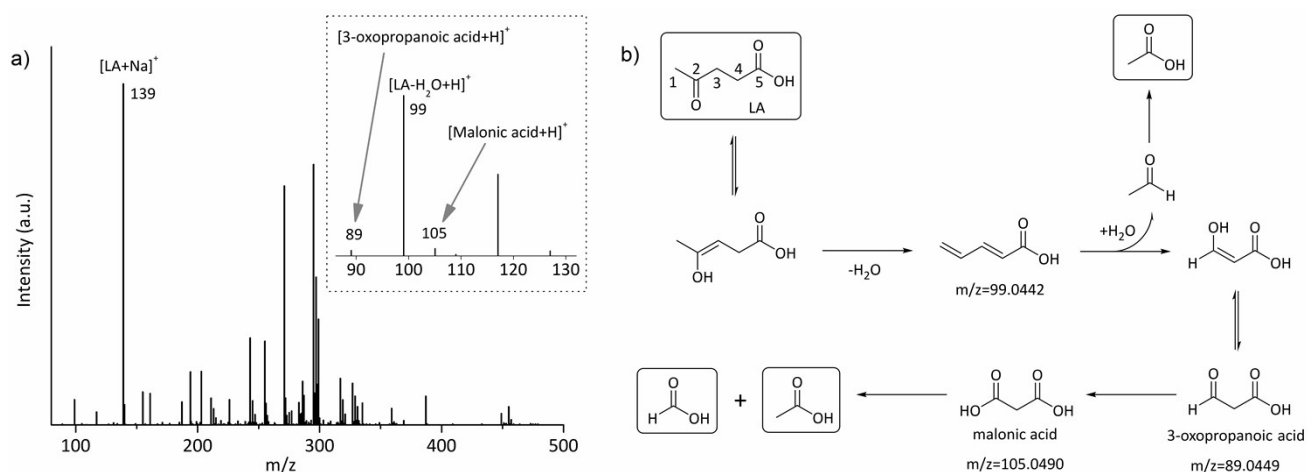

**Fig. S2.** Formation of AA and FA from LA. (a) ESI-MS spectrum of reaction mixture from reaction of LA in H<sub>2</sub>O without extra initial pressure of gas. Inserted spectrum shows the ions of 3-oxopropanoic acid, dehydrated LA and malonic acid in the range of  $m/z$  of 86 ~ 132. (b) Possible reaction pathway for the LA conversion to AA and FA. Reaction conditions: 2.2 mmol LA, 2.2 mmol HMF, 32 mL H<sub>2</sub>O, no extra initial pressure. Liquid products were obtained by being quenched with air when reaction temperature reached 190 °C.

When LA was used as the reactant without extra initial pressure in water, three characteristic peaks were observed at  $m/z$  of 89.0449, 99.0442 and 109.0267 in ESI-MS spectra (Fig. S2a). Combined the possible reaction pathway for the LA conversion to AA and FA (Fig. S2b), these peaks were corresponding to 3-oxopropanoic acid, dehydrated LA and malonic acid, respectively. Meanwhile, FA (5.1%) and AA (2.5%) was observed while the conversion of LA was 5.4% (see Table S1). The results and possible mechanism indicated that the 3-oxopropanoic acid formed after C(1)-C(2) breaking of dehydrated LA, while a molecule of acetaldehyde generated, then oxidized to AA. By oxidizing of 3-oxopropanoic acid to malonic acid and following C-C breaking, FA and s AA are obtained. However, imbalanced carbon (96.6%) and excess FA relative to AA indicated the extra reaction pathway for the oligomer formation derived from the condensation of LA with intermediates (acetaldehyde and/or 3-oxopropanoic acid) in which the  $\alpha$ -H beside aldehyde groups had higher reactivity. Ions ( $m/z > 136$ ) in ESI-MS spectrum confirmed the polymerization of intermediates.

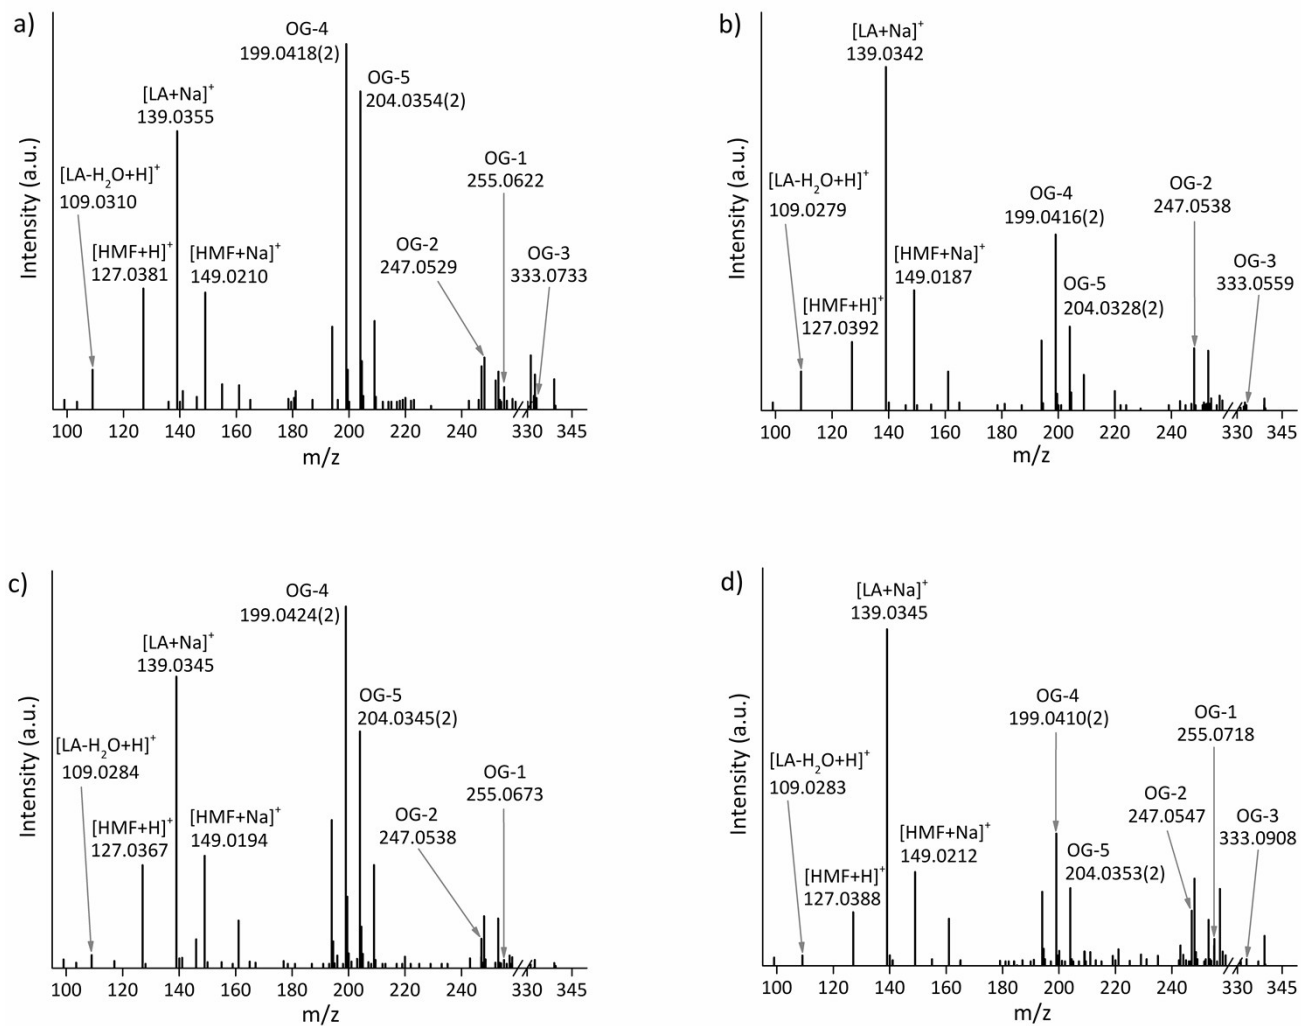

**Fig. S3.** ESI-MS spectra ( $m/z = 100 \sim 350$ ) of the reaction mixture from reaction of LA (2.2 mmol) and HMF (2.2 mmol) at 180 °C for 1 h in H<sub>2</sub>O (32 mL). (a) no extra initial pressure, (b) 1.0 MPa initial pressure of N<sub>2</sub>, (c) 1.0 MPa initial pressure of CO<sub>2</sub>, and (d) in H<sub>2</sub>O-THF (32 mL,  $V_{\text{H}_2\text{O}}/V_{\text{THF}} = 1:1$ ), no extra initial pressure.

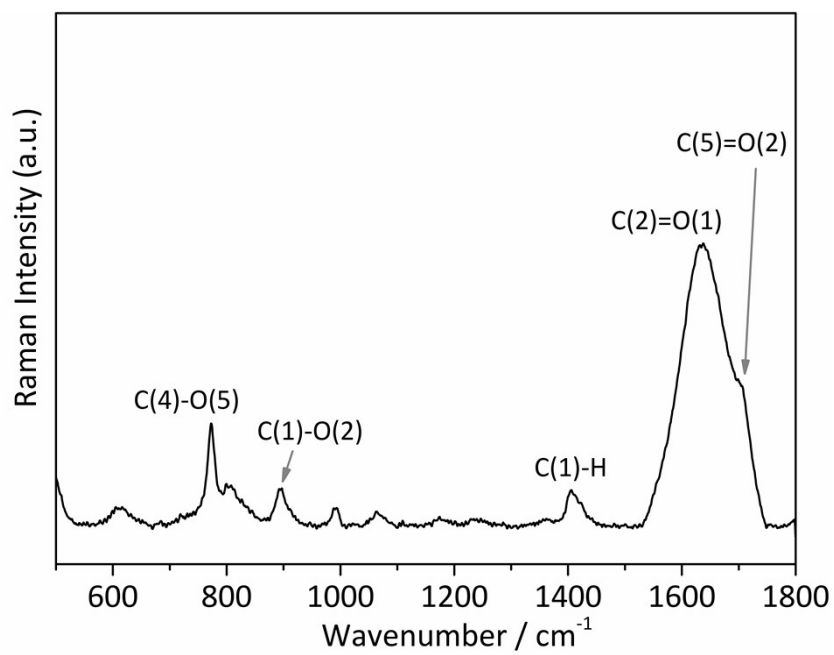

**Fig. S4.** Raman spectrum of LA in H<sub>2</sub>O at room temperature.

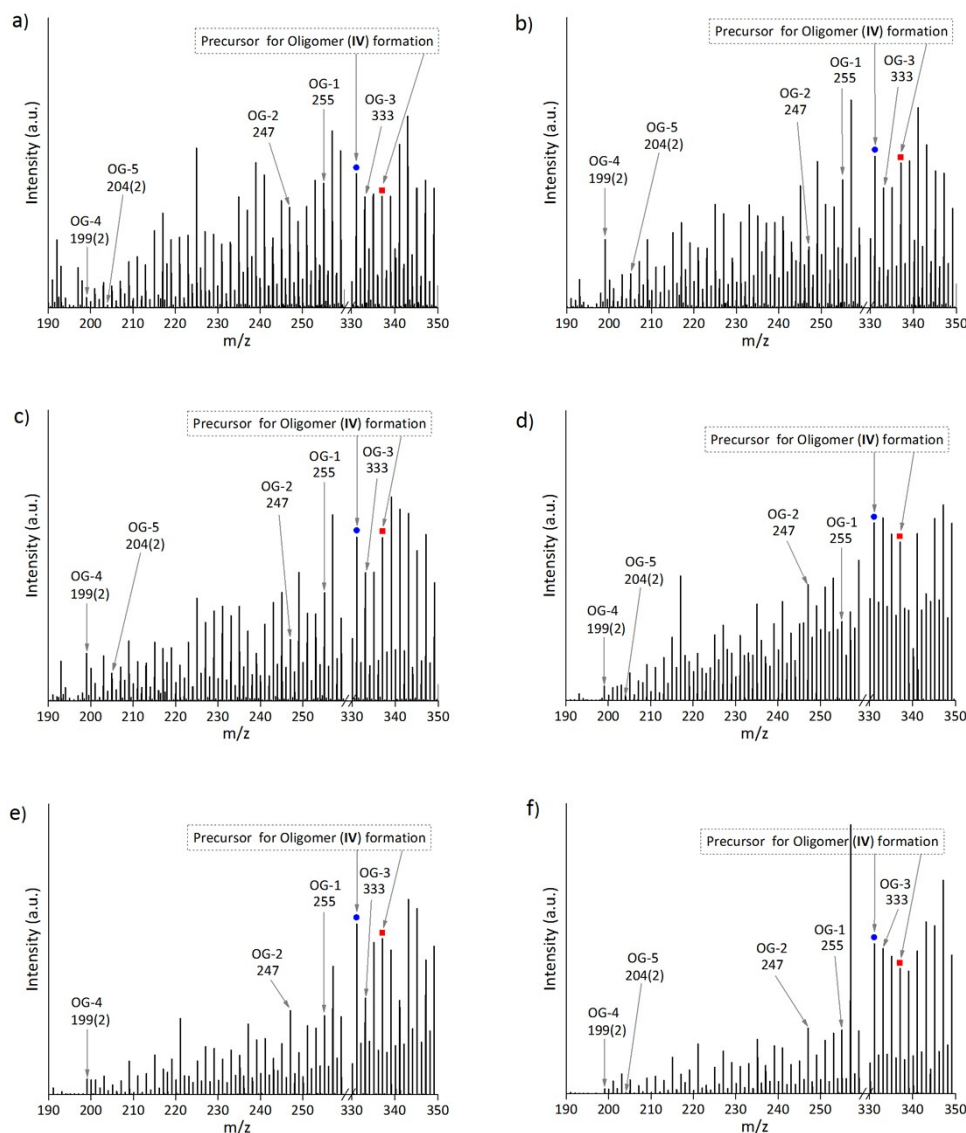

**Fig. S5.** ESI-MS spectra of the reaction mixture from reaction of glucose (2.2mmol) at 190 °C for 4 h [ in H<sub>2</sub>O (32 mL) for **a-c**, in H<sub>2</sub>O-THF (32 mL,  $V_{\text{H}_2\text{O}}/V_{\text{THF}} = 1:1$ ) for **d-f**], (**a**) no extra initial pressure, (**b**) 1.0 MPa of initial pressure of N<sub>2</sub>, (**c**) 1.0 MPa of initial pressure of CO<sub>2</sub>, (**d**) no extra initial pressure, (**e**) 1.0 MPa of initial pressure of CO<sub>2</sub>, (**f**) 2.4 MPa of initial pressure of CO<sub>2</sub>. Legend: blue solid circle (●), [2(glucose/fructose) - HCHO+H]<sup>+</sup>; red solid square (■), [2(glucose/fructose)-HCOOH + Na]<sup>+</sup>.

The peaks at  $m/z$  of 331.0995 and 337.1039 (marked as blue solid cycle and red solid square), assigned to [2(glucose/fructose)-HCHO+H]<sup>+</sup> and [2(glucose/fructose)-HCOOH+Na]<sup>+</sup> species, respectively, were observed in all reaction conditions. The results revealed that [2(glucose/fructose)-HCHO] and [2(glucose/fructose)-HCOOH] intermediates formed during glucose dehydration. That is, the condensation of two hexose molecules and following decarbonylation/decarboxylation generated HCHO/FA, accompanying with the formation of dimerized dehydrated intermediate. These species might be also precursors for the formation of Oligomer (IV).

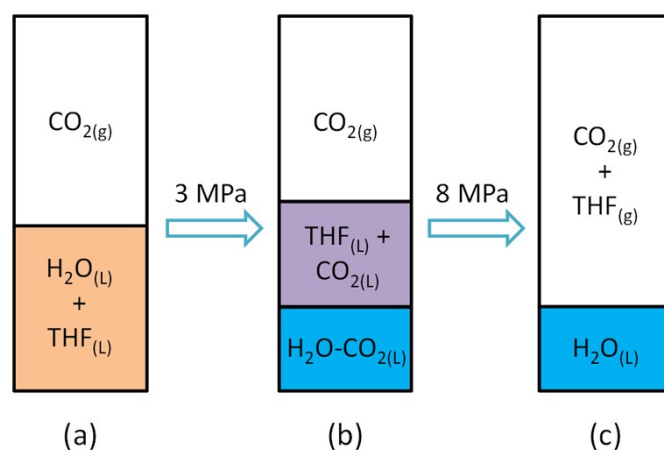

**Fig. S6.** Phase splitting of H<sub>2</sub>O-THF-CO<sub>2</sub> ternary solvent system under different pressure.<sup>[2-7]</sup> (a) biphasic H<sub>2</sub>O-THF(l)/CO<sub>2</sub>(g), (b) triphasic H<sub>2</sub>O-CO<sub>2</sub>(l)/THF-CO<sub>2</sub>(l)/CO<sub>2</sub>(g), and (c) biphasic H<sub>2</sub>O(l)/CO<sub>2</sub>-THF(g).

In the H<sub>2</sub>O-THF-CO<sub>2</sub> ternary solvent system, biphasic H<sub>2</sub>O-THF(l)/CO<sub>2</sub>(g) formed with liquid H<sub>2</sub>O-THF phase and gaseous CO<sub>2</sub> phase when the pressure of CO<sub>2</sub> was less than 3 MPa (Fig. S6a).<sup>[2-5]</sup> Increased CO<sub>2</sub> pressure (more than 3 MPa and less than 8 MPa) caused liquid phase splitting and CO<sub>2</sub> dissolving, a triphasic H<sub>2</sub>O-CO<sub>2</sub>(l)/THF-CO<sub>2</sub>(l)/CO<sub>2</sub>(g) solvent system including liquid H<sub>2</sub>O-CO<sub>2</sub> phase, liquid THF-CO<sub>2</sub> phase (CO<sub>2</sub> expanded THF liquid), and gaseous CO<sub>2</sub> phase was generated (Fig. S6b).<sup>[2-5]</sup> A CO<sub>2</sub> pressure more than 8 MPa resulted the formation of a biphasic H<sub>2</sub>O/CO<sub>2</sub>-THF(g) reaction system containing liquid H<sub>2</sub>O phase and gaseous CO<sub>2</sub>-THF phase (Fig. S6c).<sup>[6,7]</sup>

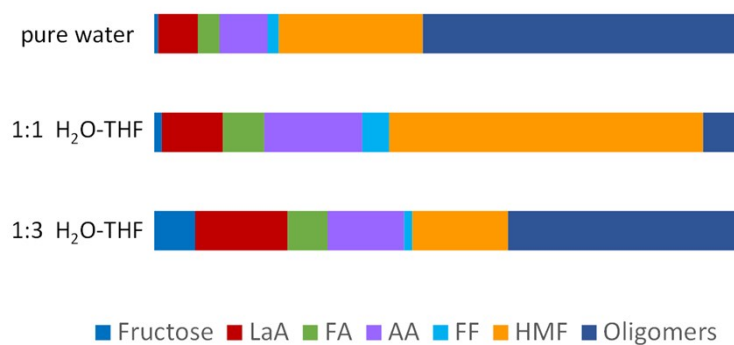

**Fig. S7.** The percentage of each product from the glucose conversion in H<sub>2</sub>O-THF with different  $V_{\text{H}_2\text{O}}/V_{\text{THF}}$ . Reaction conditions: 2.2 mmol glucose, 32 mL of solvent, 190 °C, 4 h, 1.0 MPa initial pressure of CO<sub>2</sub>.



**Table S1.** Conversion of LA to AA and FA.<sup>a</sup>

| Entry | Solvent          | X <sub>LA</sub> /% | Y <sub>FA</sub> /% | Y <sub>AA</sub> /% | Carbon balance/% |
|-------|------------------|--------------------|--------------------|--------------------|------------------|
| 1     | H <sub>2</sub> O | 5.4                | 5.1                | 2.5                | 96.6             |

<sup>a</sup>Reaction conditions: 2.2 mmol LA, 2.2 mmol HMF, 32 mL solvent, no extra initial pressure of gas. Liquid products were obtained by quenching with air when reaction temperature reached 190 °C.

In water, FA (5.1%) and AA (2.5%) were detected in the final products with LA conversion of 5.4%. The imbalanced carbon illustrated the formation of oligomers from the self-condensation of LA or aldol-condensation of LA with its decomposed intermediates. Because the peaks assigned to [3-oxopropanoic acid + H]<sup>+</sup> ( $m/z = 89.0449$ ), [LA - H<sub>2</sub>O + H]<sup>+</sup> ( $m/z = 99.0442$ ) and [malonic acid + H]<sup>+</sup> ( $m/z = 109.0267$ ) were observed in the ESI-MS spectrum (as shown in Fig. S2a), the oligomer formation was most possibly derived from the condensation of LA with acetaldehyde and/or 3-oxopropanoic acid. This process also contributed to the stoichiometric excess of FA relative to AA.

**Table S2.** Weight-average ( $M_w$ ) and number-average ( $M_n$ ) molecular weight of oligomers in the liquid products.<sup>a</sup>

| Entry | Solvent<br>( $V_{H_2O}:V_{THF}$ ) | Initial<br>atmosphere<br>(MPa) | HMF% | Peak 1 <sup>b</sup> |            | Peak 2 <sup>c</sup> |            |
|-------|-----------------------------------|--------------------------------|------|---------------------|------------|---------------------|------------|
|       |                                   |                                |      | $M_n$ (Da)          | $M_w$ (Da) | $M_n$ (Da)          | $M_w$ (Da) |
| 1     | H <sub>2</sub> O                  | -                              | 20.1 | 90                  | 103        | 363                 | 447        |
| 2     | H <sub>2</sub> O                  | N <sub>2</sub> /1.0            | 24.3 | 92                  | 102        | 410                 | 534        |
| 3     | H <sub>2</sub> O                  | CO <sub>2</sub> /1.0           | 24.5 | 117                 | 121        | 431                 | 543        |
| 4     | H <sub>2</sub> O-THF (1:1)        | -                              | 21.8 | 104                 | 121        | 483                 | 582        |
| 5     | H <sub>2</sub> O-THF (1:3)        | -                              | 14.4 | 94                  | 111        | 396                 | 440        |
| 6     | H <sub>2</sub> O-THF (1:1)        | N <sub>2</sub> /1.0            | 29.8 | 89                  | 102        | 372                 | 467        |
| 7     | H <sub>2</sub> O-THF (1:1)        | CO <sub>2</sub> /1.0           | 51.5 | 109                 | 121        | 390                 | 431        |
| 8     | H <sub>2</sub> O-THF (1:3)        | CO <sub>2</sub> /1.0           | 16.3 | 108                 | 117        | 346                 | 382        |
| 9     | H <sub>2</sub> O-THF (1:1)        | CO <sub>2</sub> /0.6           | 32.2 | 111                 | 119        | 367                 | 406        |
| 10    | H <sub>2</sub> O-THF (1:1)        | CO <sub>2</sub> /2.4           | 31.0 | 108                 | 117        | 346                 | 382        |

<sup>a</sup>Reaction conditions: 2.2 mmol glucose, 32 mL solvent, 190 °C, 4 h, with initial pressure of gas. The average molecule weight of products, <sup>b</sup><180 Da, and <sup>c</sup>≥ 180 Da.

Peak 1 was defined as small molecules with average molecule weight below 180 Da (such as HMF, FA, AA, LaA, LA and partial intermediates), and peak 2 was defined as oligomers with average molecule weight more than 180 Da.

**Table S3.** Conversion of LA and HMF into oligomers.<sup>a</sup>

| Entry | Solvent<br>( $V_{\text{H}_2\text{O}} : V_{\text{THF}}$ ) | Atmosphere      | $X_{\text{HMF}}/\%$ | $X_{\text{LA}}/\%$ | $Y_{\text{FA}}/\%$ | Carbon<br>Balance/% | Oligomers <sup>b</sup> |            |           |
|-------|----------------------------------------------------------|-----------------|---------------------|--------------------|--------------------|---------------------|------------------------|------------|-----------|
|       |                                                          |                 |                     |                    |                    |                     | $M_w$ (Da)             | $M_n$ (Da) | $M_w/M_n$ |
| 1     | H <sub>2</sub> O                                         | -               | 26.8                | 12.6               | 16.3               | 81.1                | 12628                  | 11586      | 1.09      |
| 2     | H <sub>2</sub> O                                         | N <sub>2</sub>  | 23.9                | -4.1 <sup>c</sup>  | 35.5               | 92.1                | 9092                   | 7729       | 1.08      |
| 3     | H <sub>2</sub> O                                         | CO <sub>2</sub> | 23.4                | 0.8                | 35.2               | 90.1                | 5854                   | 4365       | 1.34      |
| 4     | H <sub>2</sub> O-THF (1:1)                               | -               | 38.2                | -28.0 <sup>c</sup> | 64.2               | 97.7                | 1819                   | 1078       | 1.68      |

<sup>a</sup>Reaction conditions: 2.2 mmol LA, 2.2 mmol HMF, 32 mL solvent, 180 °C, 1 h, 1.0 MPa initial pressure of gas.

<sup>b</sup>The products with average molecule weight above 180 Da. <sup>c</sup>The negative LA conversion indicates the occurrence of HMF-to-LA/FA rehydration.

To reduce the formation of solid humins from oligomers, the reaction temperature was decreased to 180 °C instead of 190 °C (the reaction temperature used in glucose conversion). Comparable HMF conversions were obtained in H<sub>2</sub>O under different reaction pressure and atmosphere (entry 1-3), while the different LA conversion and carbon balance indicated the difference in the reaction pathways between HMF and LA. In H<sub>2</sub>O without extra initial pressure, the higher LA conversion (12.6%) and lower carbon balance (81.1%) indicated that significant cross-condensation between HMF and LA occurred. In pressured N<sub>2</sub> atmosphere, the negative LA conversion (-4.1%) with better carbon balance (92.1%) revealed the primary occurrence of HMF-to-LA/FA rehydration. While in pressured CO<sub>2</sub> atmosphere, the lower conversion of LA (0.8%) with carbon balance of 90.1% suggested an approximately equal HMF rehydration and condensation. In H<sub>2</sub>O-THF without extra initial pressure, a higher HMF conversion of 38.2% and negative LA conversion with highest carbon balance (97.7%) illustrated the predominant occurrence of HMF-to-LA/FA rehydration. From the GPC analysis, when LA and HMF were used as substrates, the average molecule weights were significantly higher (above 1000 Da) than that in glucose conversion (below 600 Da) because of the use of high concentration LA. Notably, insoluble humins were observed in H<sub>2</sub>O, especially in the atmosphere without extra initial pressure.

**Table S4.** Characteristic Raman scattering peaks of LA and HMF (500-2000  $\text{cm}^{-1}$ ).<sup>[7, 8]</sup>

| Entry | Peak/ $\text{cm}^{-1}$ | Raman Vibration                                                     |
|-------|------------------------|---------------------------------------------------------------------|
| HMF   | 966                    | C(2)-O(1) stretching vibration                                      |
|       | 986                    | C(5)-O(1) stretching vibration                                      |
|       | 1025                   | C(1)-O(2) stretching vibration,<br>C(3)/C(4)-H scissoring vibration |
|       | 1200                   | C(3)-H/C(5)-H rocking vibration                                     |
|       | 1368                   | C(1)-H wagging vibration                                            |
|       | 1400                   | H-C(6)-C(5)/O(3) bending vibration                                  |
|       | 1457                   | C(1)-H scissoring vibration                                         |
|       | 1524                   | C(2)=C(3)/C(4)=C(5) symmetric stretching vibration                  |
|       | 1580                   | C(2)-C(3)/C(4)-C(5) asymmetric stretching vibration                 |
|       | 1659                   | C(6)=O(3) stretching vibration                                      |
| LA    | 770                    | C(4)-C(5) stretching vibration                                      |
|       | 896                    | C(1)-C(2) stretching vibration                                      |
|       | 1410                   | C(1)-H twisting vibration                                           |
|       | 1662                   | C(2)=O(1) stretching vibration                                      |
|       | 1714/1743              | C(5)=O(2) stretching vibration                                      |

**Table S5.** Time-resolved conversion of LA and HMF.<sup>a</sup>

| Entry | Solvent         | X <sub>HMF</sub> /% | X <sub>LA</sub> /% | Y <sub>FA</sub> /% | Y <sub>AA</sub> /% | Carbon Balance/% |
|-------|-----------------|---------------------|--------------------|--------------------|--------------------|------------------|
| 1     | 100 °C (0 min)  | -                   | -                  | -                  | -                  | 100              |
| 2     | 150 °C (0 min)  | 0.9                 | 1.0                | 0.4                | 0.3                | 98.7             |
| 3     | 180 °C (0 min)  | 1.8                 | 1.6                | 0.7                | 0.4                | 98.8             |
| 4     | 180 °C (15 min) | 6.2                 | 1.7                | 1.0                | 0.5                | 96.2             |
| 5     | 180 °C (30min)  | 15.3                | 14.2               | 4.3                | 1.0                | 85.7             |

<sup>a</sup>Reaction conditions: 2.2 mmol LA, 2.2 mmol HMF, 32 mL solvent, 160 °C, 1 h, without extra initial pressure.

**Table S6.** Production of different product in glucose conversion.

| Entry | Solvent                      | Catalyst            | Time (h) | Temperature (°C) | Initial pressure (MPa) | Conversion (%) | Main Product (%)      | Selectivity (%) | Carbon Balance (%) | Ref.                                                          |
|-------|------------------------------|---------------------|----------|------------------|------------------------|----------------|-----------------------|-----------------|--------------------|---------------------------------------------------------------|
| 1     | H <sub>2</sub> O             | Sn-beta             | 0.5      | 110              | -                      | 55             | Fructose (32)         | 58.2            | 86                 | <i>Proc. Natl. Acad. Sci.</i> , 2010, <b>107</b> , 6164-6168. |
| 2     | H <sub>2</sub> O             | Ba(OH) <sub>2</sub> | 48       | 25               | -                      | 99.5           | LaA (95.4)            | 95.9            | 95.9               | <i>Green Chem.</i> , 2017, <b>19</b> , 76-81.                 |
| 3     | H <sub>2</sub> O             | Amberlyst-15        | 3        | 120              | -                      | 89             | FA (37.4)             | 42.3            | 84.6               | <i>J. Am. Chem. Soc.</i> , 2011, <b>133</b> , 4224-4227.      |
| 4     | water/(THF+NMP) <sup>a</sup> | P-TiO <sub>2</sub>  | 1.75     | 175              | 2.0 (Ar)               | 98.2           | HMF (90.5)            | 92.2            | 92.3               | <i>ChemSusChem</i> , 2015, <b>8</b> , 2907-2916.              |
| 5     | THF                          | sulfuric acid       | 3        | 190              | -                      | ~97            | LGO (40) <sup>b</sup> | ~41             | ~60                | <i>Energy Environ. Sci.</i> , 2015, <b>8</b> , 1808-1815.     |

<sup>a</sup>V<sub>water</sub>/V<sub>(THF-NMP)</sub> = 1:4, 4 g of NaCl. <sup>b</sup>Levogluconone

**Table S7.** Conversion of typical carbohydrates into HMF in triphasic CO<sub>2</sub>-H<sub>2</sub>O-THF with 1.0 MPa initial pressure of CO<sub>2</sub>.<sup>a</sup>

| Entry | Substrate  | Y <sub>glucose</sub> /% | Y <sub>HMF</sub> /% | Y <sub>fructose</sub> /% | Y <sub>LaA</sub> /% | Y <sub>FA</sub> /% | Y <sub>AA</sub> /% | Y <sub>LA</sub> /% | Carbon balance/% |
|-------|------------|-------------------------|---------------------|--------------------------|---------------------|--------------------|--------------------|--------------------|------------------|
| 1     | maltose    | 25.0                    | 39.9                | 3.4                      | 3.0                 | 13.7               | 9.7                | -                  | 75.3             |
| 2     | cellobiose | 24.9                    | 40.9                | 2.0                      | -                   | 14.2               | 10.9               | -                  | 73.8             |
| 3     | starch     | 31.4                    | 36.9                | 2.4                      | -                   | 10.3               | 10.8               | -                  | 76.0             |
| 4     | glycogen   | 34.0                    | 41.4                | 2.4                      | -                   | 10.7               | 12.7               | -                  | 83.8             |
| 5     | sucrose    | 10.6                    | 35.9                | 0.6                      | 6.0                 | 16.3               | 8.7                | 2.3                | 57.6             |

<sup>a</sup>Reaction conditions: 2.2 mmol substrate (based on the C<sub>6</sub> unit), 32 mL solvent (V<sub>H<sub>2</sub>O</sub>/V<sub>THF</sub> = 1:1), 190 °C, 4 h.

## References

- [1] L Yang, G Tsilomelekis, S Caratzoulas, D. G. Vlachos, *ChemSusChem*, 2015, **8**, 1334-1341
- [2] C. A. Eckert, C. L. Liotta, D. Bush, J. S. Brown and J. P. Hallett, *J. Phys. Chem. B*, 2004, **108**, 18108-18118.
- [3] P. Pollet, R. J. Hart, C. A. Eckert and C. L. Liotta, *Acc. Chem. Res.*, 2010, **43**, 1237-1245.
- [4] P. Pollet, E. A. Davey, E. E. Urena-Benavides, C. A. Eckert and C. L. Liotta, *Green Chem.*, 2014, **16**, 1034-1055.
- [5] P. Pollet, A. L. Ethier, J. C. Senter, C. A. Eckert and C. L. Liotta, *J. Visualized Exp.*, 2014, **83**, 1-11.
- [6] A. R. C. Morais, M. Matuchaki, J. Andreaus and R. Bogel-Lukasik, *Green Chem.*, 2016, **18**, 2985-2994.
- [7] A. R. C. Morais and R. Bogel-Lukasik, *Green Chem.*, 2016, **18**, 2331-2334.
- [8] T. Kim, R. S. Assary, C. L. Marshall, D. J. Gosztola, L. A. Curtiss and P. C. Stair, *Chem. Phys. Lett.*, 2012, **531**, 210-215.
- [9] T. Kim, R. S. Assary, L. A. Curtiss, C. L. Marshall and P. C. Stair, *J. Raman Spectrosc.*, 2011, **42**, 2069-2076.
